# Supplementary material for: Impact of Early Versus Delayed Permanent Pacemaker Implantation on Clinical Outcomes in Patients with Third-Degree Atrioventricular Block After Transcatheter Aortic Valve Replacement: A National Inpatient Sample Analysis
Source: Research Square preprint supplement (doi:10.21203/rs.3.rs-7612537/v1), 2025-10-03
Supplement: Supplementary file 1 [file 5489da0a7303431745f6aa3c.docx]

**Supplementary Table 2. Multivariable Regression Analysis in Third-Degree AV Block patients with PPM Implantation Timing in the Sensitivity Cohort (Excluding Complete Bundle Branch Block) Following TAVR**

| Outcomes | Unadjusted |  |  | After Adjusted |  |  |
| --- | --- | --- | --- | --- | --- | --- |
| OR/β | 95% CI | P-Value | OR/β | 95% CI | P-Value |
| In-hospital mortality | 1.1 | (0.5, 2.6) | 0.781 | 0.7 | (0.3, 1.7) | 0.398 |
| Hospitalization expenses | 90769 | (74665.8, 106872.3) | <0.001 | 61162.4 | (45162.3, 77162.5) | <0.001 |
| Length of stay | 6.7 | (6.3, 7.2) | <0.001 | 5.7 | (5.3, 6.2) | <0.001 |

TAVR, transcatheter aortic valve replacement; AV, atrioventricular; PPM, permanent pacemaker.

β (95%CI) P-Value / OR (95%CI) P-Value.
