# Supplementary material for: Impact of Early Versus Delayed Permanent Pacemaker Implantation on Clinical Outcomes in Patients with Third-Degree Atrioventricular Block After Transcatheter Aortic Valve Replacement: A National Inpatient Sample Analysis
Source: Research Square preprint supplement (doi:10.21203/rs.3.rs-7612537/v1), 2025-10-03
Supplement: Supplementary file 2 [file a0268c7318854868081b65dd.docx]

**Supplementary Table 1. ICD 10 Diagnosis Codes Used in the Study**

|  | ICD 10 Codes |
| --- | --- |
| Transcatheter aortic valve replacement | 02RF3JZ, 02RF3KZ, 02RF38Z, 02RF37Z,  02RF37H, 02RF38H, 02RF3JH, 02RF3KH |
| Permanent pacemaker | 0JH604Z, 0JH634Z, 0JH804Z, 0JH834Z,  0JH605Z, 0JH635Z, 0JH805Z, 0JH835Z,  0JH606Z, 0JH636Z, 0JH806Z, 0JH836Z |
| Third degree atrioventricular block | I442 |
| Left bundle branch block | I44.7, I444, I445 |
| Right bundle branch block | I45.1, I45.10, I45.19., I45.0 |
| Congestive heart failure | I09.9, I11.0, I13.0, I13.2, I25.5, I42.0,  I42.5–I42.9, I43, I50, P29.0 |
| Hypertension | I10, I11-I13, I15 |
| Diabetes | E10.0, E10.1, E10.9, E11.0, E11.1, E11.9,  E12.0, E12.1, E12.9, E13.0, E13.1, E13.9,  E14.0, E14.1, E14.9 |
| Anemia | D50.0, D50.8, D50.9, D51.x-D53.x |
| Coagulopathy | D65–D68, D69.1, D69.3–D69.6 |
| Cardiac arrhythmias | I44.1-I44.3, I45.6, I45.9, I47.x-I49.x, R00.0,  R00. 1, R00.8, T82.1, Z45.0, Z95.0 |
| Obesity | E66.x |
| Weight loss | E40.x-E46.x, R63.4, R64 |
| Pulmonary circulation disorders | I26.x, I27.x, I28.0, I28.8, I28.9 |
| Smoking | F17, T65, Z72.0, O99.33, Z87.891 |
| Chronic kidney disease | N181, N182, N183, N184,N185, N189,N186 |
| Perivalvular leak | T82.03 |
| Pericardial tamponade | I31.4 |
| Value-in-value transcatheter aortic valve replacement | Z952 |
| Prior myocardial infarction | I25.2 |
| Prior Stroke | Z86.73, I69 |
| Prior Cardiac arrest | Z86.74 |
| Prior percutaneous coronary intervention | Z98.61, Z95.5 |
| Prior coronary artery bypass grafting | Z95.1 |
| Prior pacemaker | Z950 |

ICD, International Classification of Diseases.
