# Supplementary material for: Impact of Early Versus Delayed Permanent Pacemaker Implantation on Clinical Outcomes in Patients with Third-Degree Atrioventricular Block After Transcatheter Aortic Valve Replacement: A National Inpatient Sample Analysis
Source: Research Square preprint supplement (doi:10.21203/rs.3.rs-7612537/v1), 2025-10-03
Supplement: Supplementary file 3 [file c3dd60f0aa2e54271e2716b4.docx]

#### **Supplementary Table 3**. **Estimate of treatment effects using IPTW**

| IPW using PS0 | In-hospital mortality | Hospitalization expenses | Length of stay |
| --- | --- | --- | --- |
| ATT | 1.1 (0.5, 2.3) 0.9000 | 80277.1 (65238.5, 95315.7) <0.0001 | 6.3 (5.8, 6.8) <0.0001 |
| ATC | 1.3 (0.6, 2.7) 0.5738 | 82604.6 (67502.9, 97706.4) <0.0001 | 6.3 (5.8, 6.8) <0.0001 |
| ATE | 1.2 (0.5, 2.6) 0.6543 | 81988.1 (66998.0, 96978.2) <0.0001 | 6.3 (5.8, 6.8) <0.0001 |

IPTW, inverse probability of treatment weighting; IPW, inverse probability weighting; PS0, baseline propensity score; ATT: average treatment effect on the treated; ATC, average treatment effect on the controls; ATE, average treatment effect.

Results in table: β (95%CI) Pvalue / OR (95%CI) Pvalue.
